# Supplementary material
Source: PubMed Central journal article supplement (PMC2996442)
Supplement: 1009201107_pnas.201009201SI.pdf [file 1009201107_pnas.201009201SI.pdf]

# Supporting Information

Quintana et al. 10.1073/pnas.1009201107

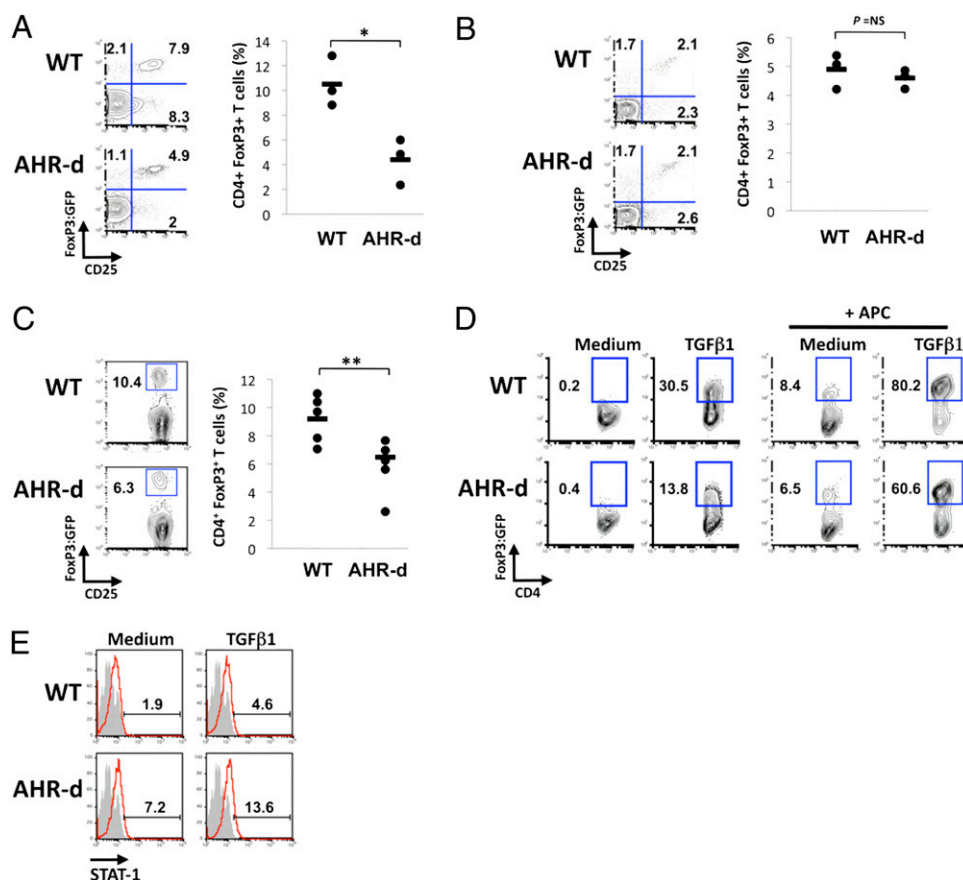

**Fig. S1.** AHR activation by endogenous ligands promotes the differentiation of FoxP3<sup>+</sup> iTreg. (A and B) Frequency of CD4<sup>+</sup> FoxP3:GFP<sup>+</sup> T<sub>reg</sub> in the thymus (A) and the MLN (B) of naive AHR-d Foxp3<sup>9Pfl</sup> and Foxp3<sup>9Pfl</sup> knock-in mice. \**P* < 0.05 compared with WT mice. (C) CD4<sup>+</sup> Foxp3:GFP<sup>+</sup> T cells from naive AHR-d Foxp3<sup>9Pfl</sup> and Foxp3<sup>9Pfl</sup> mice were transferred into RAG-1-deficient hosts, the recipients were immunized with MOG<sub>35-55</sub> in IFA, and the frequency of CD4<sup>+</sup> FoxP3:GFP<sup>+</sup> T<sub>reg</sub> was analyzed in the spleen 3 wk after immunization. \*\**P* < 0.01 compared with recipients of WT cells. (D) Naive CD4<sup>+</sup> Foxp3:GFP<sup>+</sup> T cells from AHR-d Foxp3<sup>9Pfl</sup> and Foxp3<sup>9Pfl</sup> knock-in mice were stimulated for 5 d with plate-bound antibodies to CD3 and CD28, or with soluble antibodies to CD3 and irradiated APCs, in the presence of IL-2 and TGF-β1, and the frequency of CD4<sup>+</sup> Foxp3:GFP<sup>+</sup> T cells was quantified by FACS. (E) Naive CD4<sup>+</sup> Foxp3:GFP<sup>+</sup> T cells from naive AHR-d or WT mice were activated for 2 d with plate-bound antibodies to CD3 and CD28, with or without IL-2, TGF-β1, and IL-2 + TGF-β1, and the phosphorylation of Stat1 was analyzed by FACS. Representative data of one of at least three experiments that produced similar results.

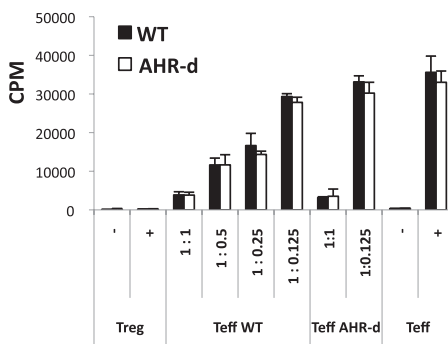

**Fig. S2.** Suppressive activity in WT and the d allele of *ahr* (aryl hydrocarbon receptor) (AHR-d) FoxP3<sup>+</sup> T<sub>reg</sub>. CD4<sup>+</sup> Foxp3:GFP<sup>+</sup> T<sub>reg</sub> were isolated from WT or AHR-d mice and their suppressive activity was analyzed in coculture experiments using naive Foxp3:GFP<sup>+</sup> T cells activated with antibodies to CD3 and irradiated antigen presenting cells (APCs) as responder T cells. Representative data of one of two experiments that produced similar results.

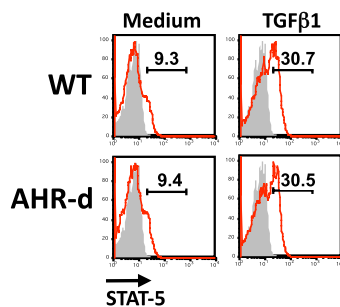

**Fig. S3.** AHR activation does not limit Stat 5 signaling. Naive CD4<sup>+</sup> Foxp3:GFP<sup>-</sup> T cells from naive AHR-d or WT mice were activated for 2 d with plate-bound antibodies to CD3 and CD28, with or without IL-2, TGF-β1, and IL-2 + TGFβ1, and the phosphorylation of Stat5 was analyzed by FACS. Representative data of three experiments that produced similar results.

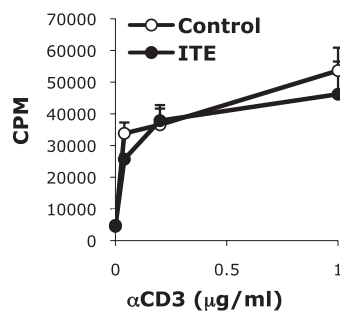

**Fig. S4.** AHR activation by the nontoxic endogenous ligand 2-(1'H-indole-3'-carbonyl)-thiazole-4-carboxylic acid methyl ester (ITE) does not result in general immunosuppression. Proliferative response to anti-CD3 of lymph node cells from ITE- or control-treated animals 10 d after immunization with MOG<sub>35-55</sub> in complete Freund's adjuvant (CFA). Cell proliferation is indicated as cpm + SD in triplicate wells.

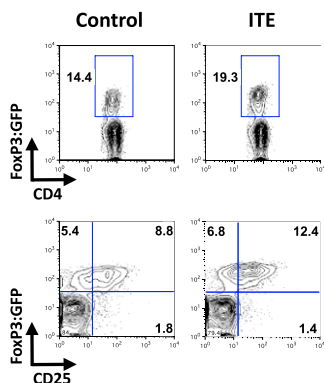

**Fig. S5.** Frequency of FoxP3<sup>+</sup> T<sub>reg</sub> in SJL treated mice. Frequency of CD4<sup>+</sup>Foxp3:GFP<sup>+</sup> T<sub>reg</sub> in splenocytes from ITE or control treated SJL mice, 30 d after experimental autoimmune encephalomyelitis (EAE) induction. Representative data of one of two experiments that produced similar results.

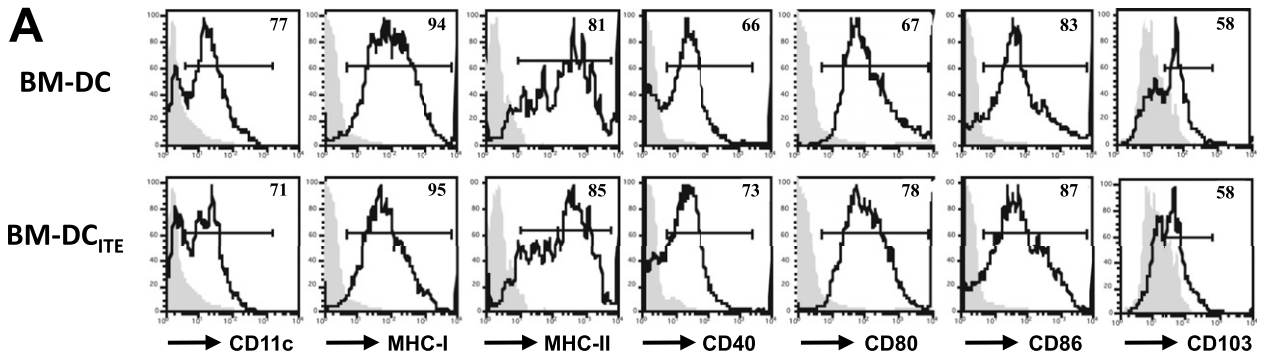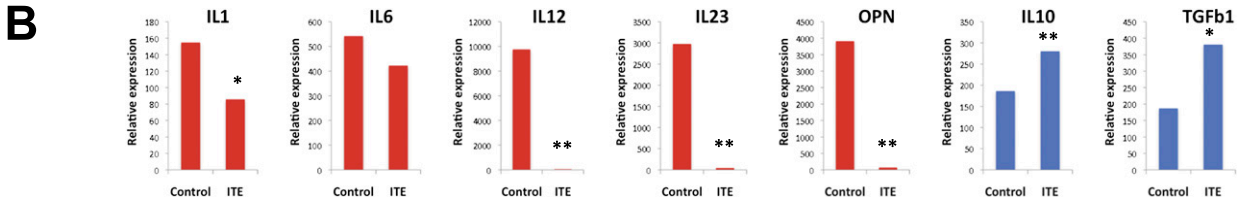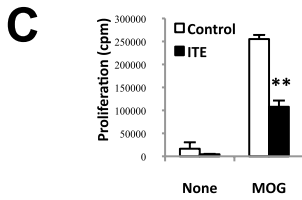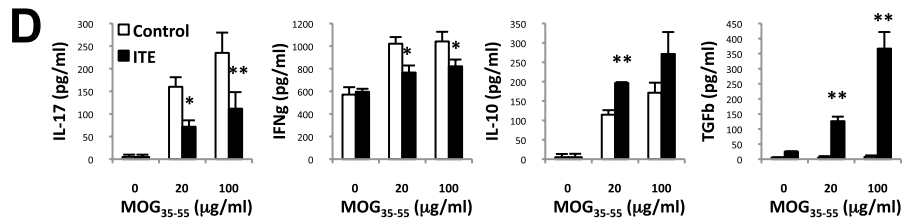

**Fig. S6.** Bone marrow-dendritic cell (BM-DC) differentiated in the presence of ITE are tolerogenic DCs. (A) FACS analysis of BM-DC treated with ITE (BM-DC<sub>ITE</sub>) or vehicle (BM-DC) as control. Numbers in plots indicate the percent of positive cells; the staining obtained with isotype-matched control antibodies is shown in gray. (B) Quantitative PCR analysis of cytokine expression by splenic DC isolated from ITE- or control-treated mice; results are presented relative to GAPDH mRNA. \* $P < 0.01$  and \*\* $P < 0.001$  compared with BM-DC differentiated from WT mice. (C and D) Naive  $2D2^+ CD4^+ FoxP3:GFP^-$  T cells were stimulated with BM-DC<sub>ITE</sub> or BM-DC and MOG<sub>35-55</sub>, and proliferation (C) and cytokine secretion (D) was analyzed. \* $P < 0.01$  and \*\* $P < 0.001$  when compared with T cells incubated with BM-DC differentiated from WT mice. Representative data of one of three experiments that produced similar results.

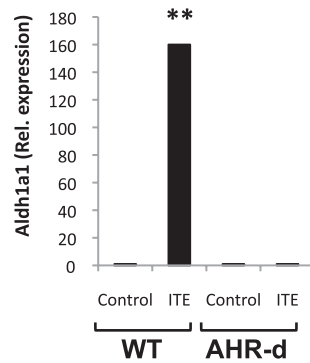

**Fig. S7.** Increased *aldh1a2* expression by BM-DC<sub>ITE</sub>. Quantitative PCR analysis of *aldh1a2* expression by splenic DCs isolated from ITE- or control-treated WT or AHR-d mice; results are presented relative to GAPDH mRNA. \*\*,  $P < 0.001$  when compared with BM-DC taken from control-treated WT mice or BM-DC<sub>ITE</sub> from AHR-d mice. Representative data of one of two experiments that produced similar results.

**Table S1. Measurement of liver toxicity in ITE-treated mice**

| Test                 | Units | Control | ITE     | Reference range |
|----------------------|-------|---------|---------|-----------------|
| ALT (GPT)            | U/L   | 16 ± 2  | 19 ± 4  | 0–54            |
| AST (GOT)            | U/L   | 79 ± 29 | 94 ± 17 | 9–74            |
| Alkaline phosphatase | U/L   | 75 ± 8  | 55 ± 11 | 36–300          |
| Total bilirubin      | mg/dL | 0 ± 0   | 0 ± 0   | 0.1–1.2         |
| Direct bilirubin     | mg/dL | 0 ± 0   | 0 ± 0   | 0.0–0.8         |
| Total protein        | g/dL  | 6 ± 0   | 5 ± 0   | 4.4–8.0         |
| Albumin              | g/dL  | 2 ± 0   | 3 ± 0   | 2.9–5.4         |
| Globulin             | g/dL  | 3 ± 0   | 3 ± 0   | 2.0–4.0         |

ALT, L-alanine: 2-oxoglutarate aminotransferase; AST, aspartate aminotransferase; GOT, glutamic oxalacetic transaminase; GPT, glutamyl pyruvic transaminase.
